# Supplementary material
Source: publisher figshare collection journal article supplement (https://gsajournals.figshare.com/ndownloader/files/12761618)
Supplement: Supplementary file 1 [file 12761618]

**Supplementary Table S1. Summary of the number of lines per maturity group for each run.**

| Maturity group | Number of lines<br>(Run # 1 & 2) |
|----------------|----------------------------------|
| Very quick     | 27                               |
| Quick          | 64                               |
| Moderate       | 32                               |
| Slow           | 26                               |
| Very slow      | 17                               |
| Total          | 168                              |

**Supplementary Table S2. Summary of the mean, minimum and maximum number of spikes for each treatment and runs.**

| <i>Treatment</i> | <i>Run# 1</i> |            |            | <i>Run# 2</i> |            |            |
|------------------|---------------|------------|------------|---------------|------------|------------|
|                  | <i>Mean</i>   | <i>Min</i> | <i>Max</i> | <i>Mean</i>   | <i>Min</i> | <i>Max</i> |
| <i>Control</i>   | 7.5           | 0          | 18         | 6.7           | 3          | 21         |
| <i>Stress</i>    | 11.7          | 0          | 27         | 8.4           | 3          | 21         |
